# Supplementary material for: Modulation of Prostanoids Profile and Counter-Regulation of SDF-1α/CXCR4 and VIP/VPAC2 Expression by Sitagliptin in Non-Diabetic Rat Model of Hepatic Ischemia-Reperfusion Injury
Source: MDPI journal article supplement (doi:10.3390/ijms222313155), 2021-12-05
Supplement: s1 [file s1]

## **Modulation of Prostanoids Profile and Counter-Regulation of SDF-1 $\alpha$ /CXCR4 and VIP/VPAC2 Expression by Sitagliptin in Non-Diabetic Rat Model of Hepatic Ischemia-Reperfusion Injury**

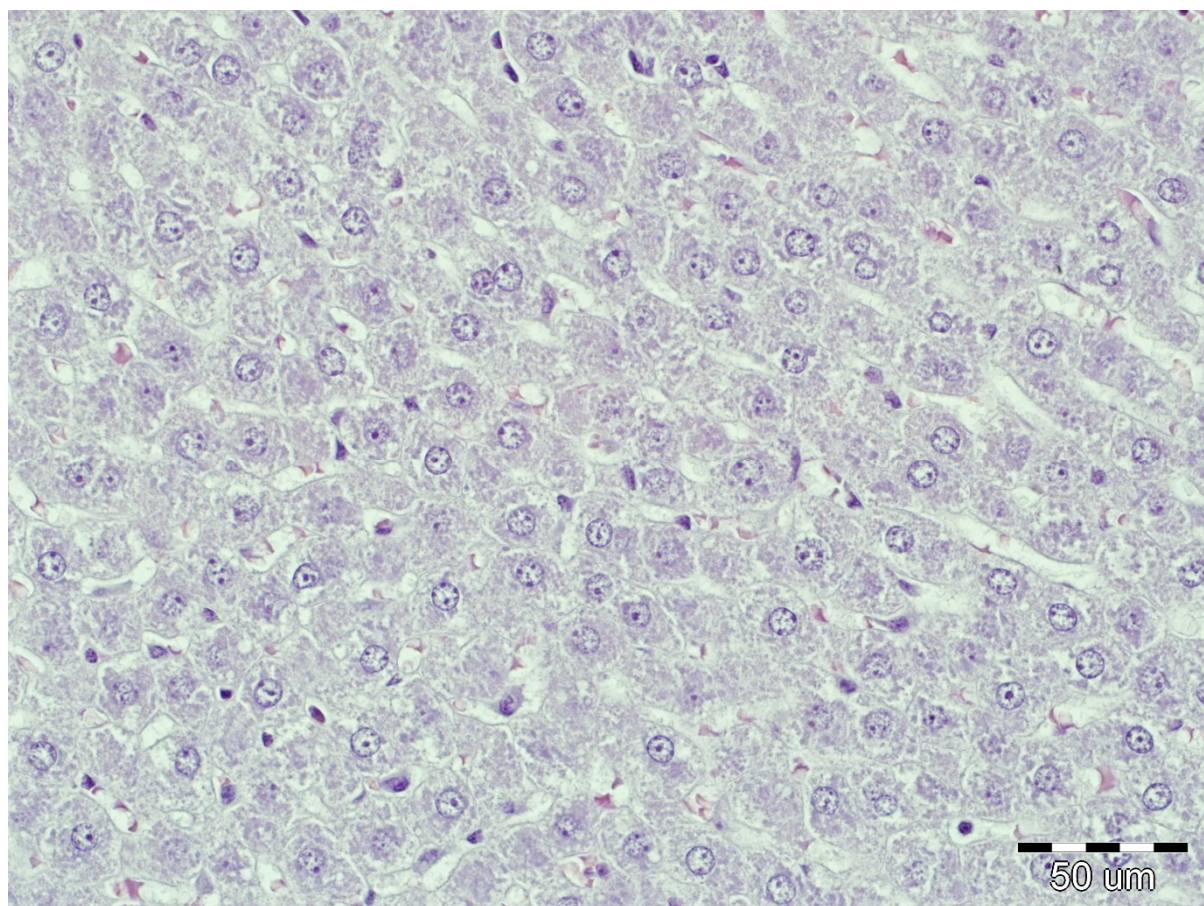

**Figure S1.** Histological findings validating the established rat model of hepatic ischemia-reperfusion injury—exemplary liver tissue from a control group animal (sham-operated, no pretreatment with sitagliptin). Slides were stained with hematoxylin and eosin and are presented at  $\times 400$  magnification with a reference bar corresponding with 50  $\mu\text{m}$ .

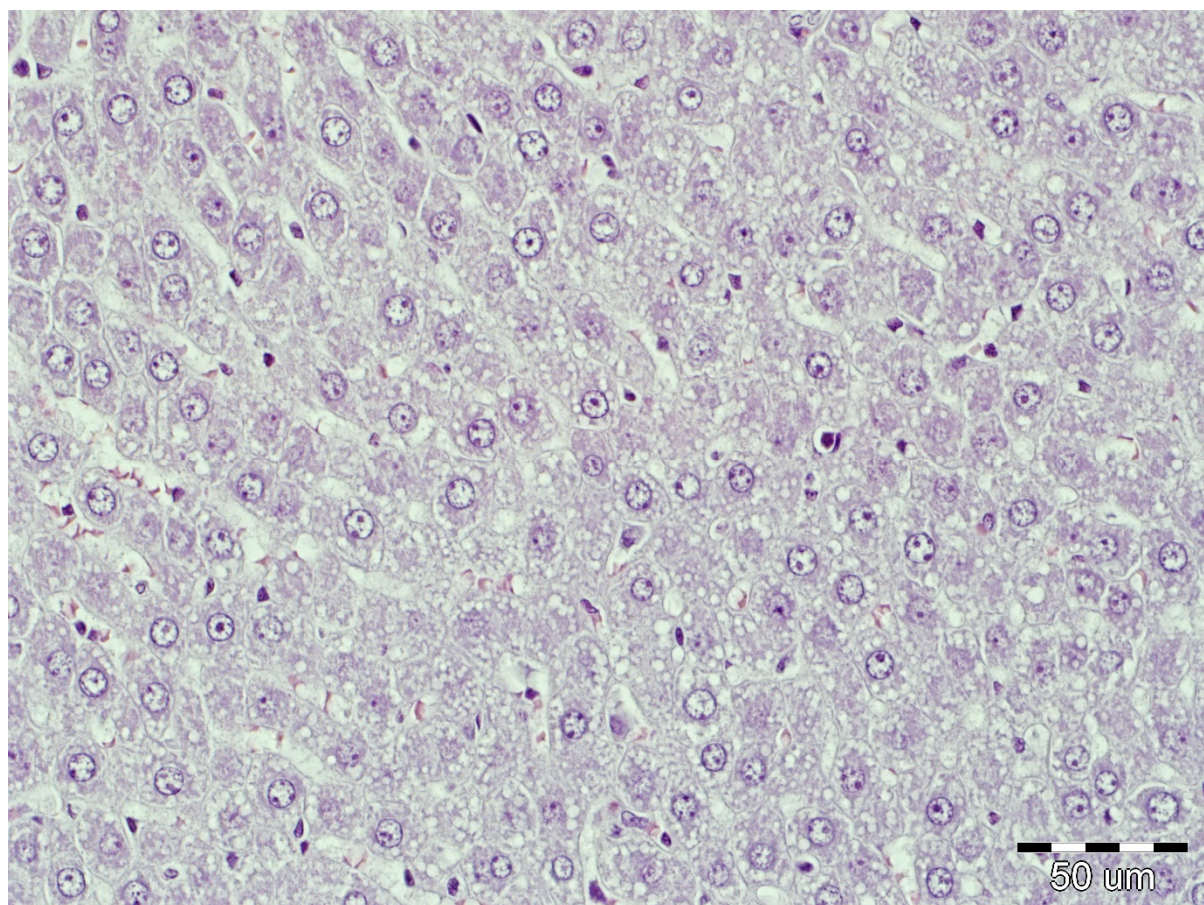

**Figure S2.** Histological findings validating the established rat model of hepatic ischemia-reperfusion injury—exemplary liver tissue from a sitagliptin group animal (sham-operated, pretreatment with sitagliptin). Slides were stained with hematoxylin and eosin and are presented at  $\times 400$  magnification with a reference bar corresponding with 50  $\mu\text{m}$ .



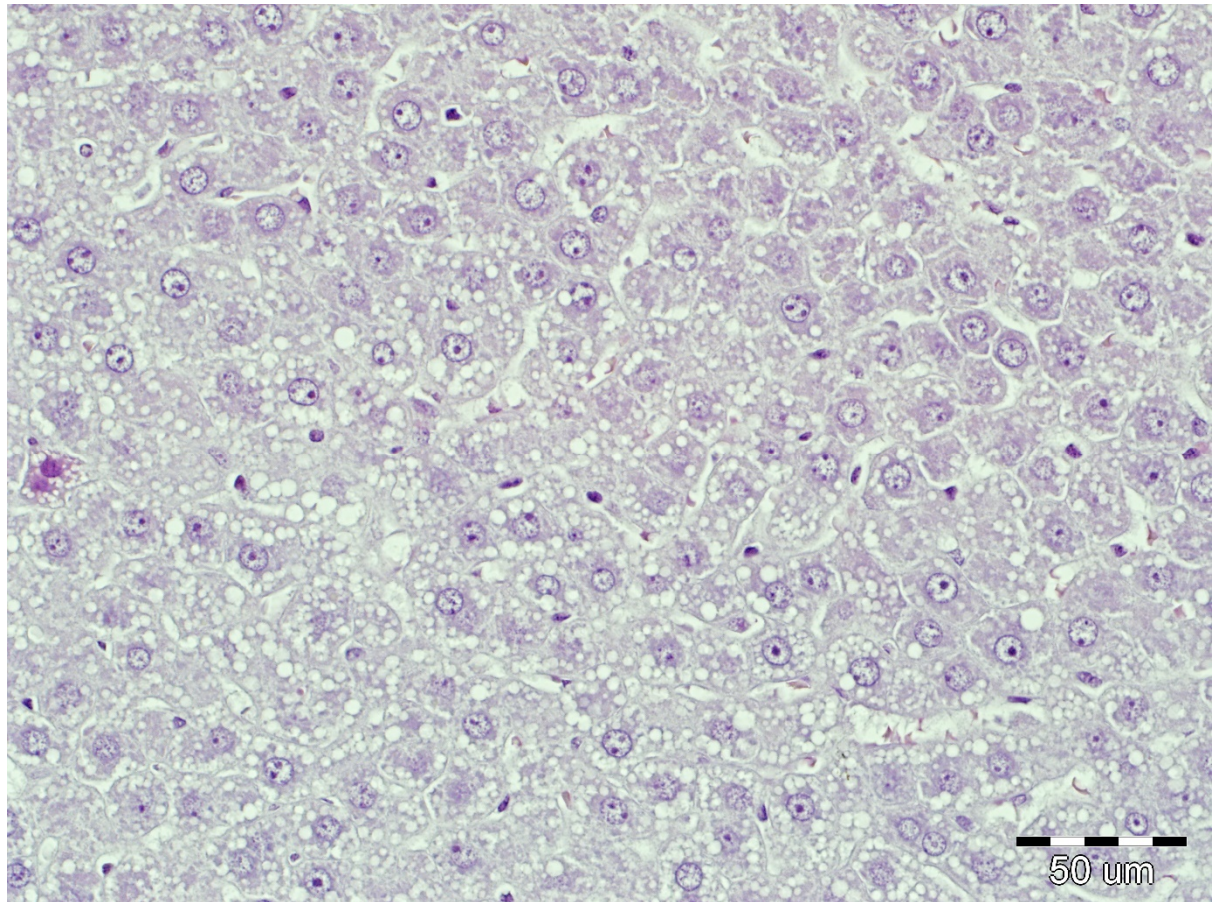

**Figure S3.** Histological findings validating the established rat model of hepatic ischemia-reperfusion injury —exemplary liver tissue from an IR group animal (subjected to ischemia-reperfusion, no pretreatment with sitagliptin). Slides were stained with hematoxylin and eosin and are presented at ×400 magnification with a reference bar corresponding with 50 μm.

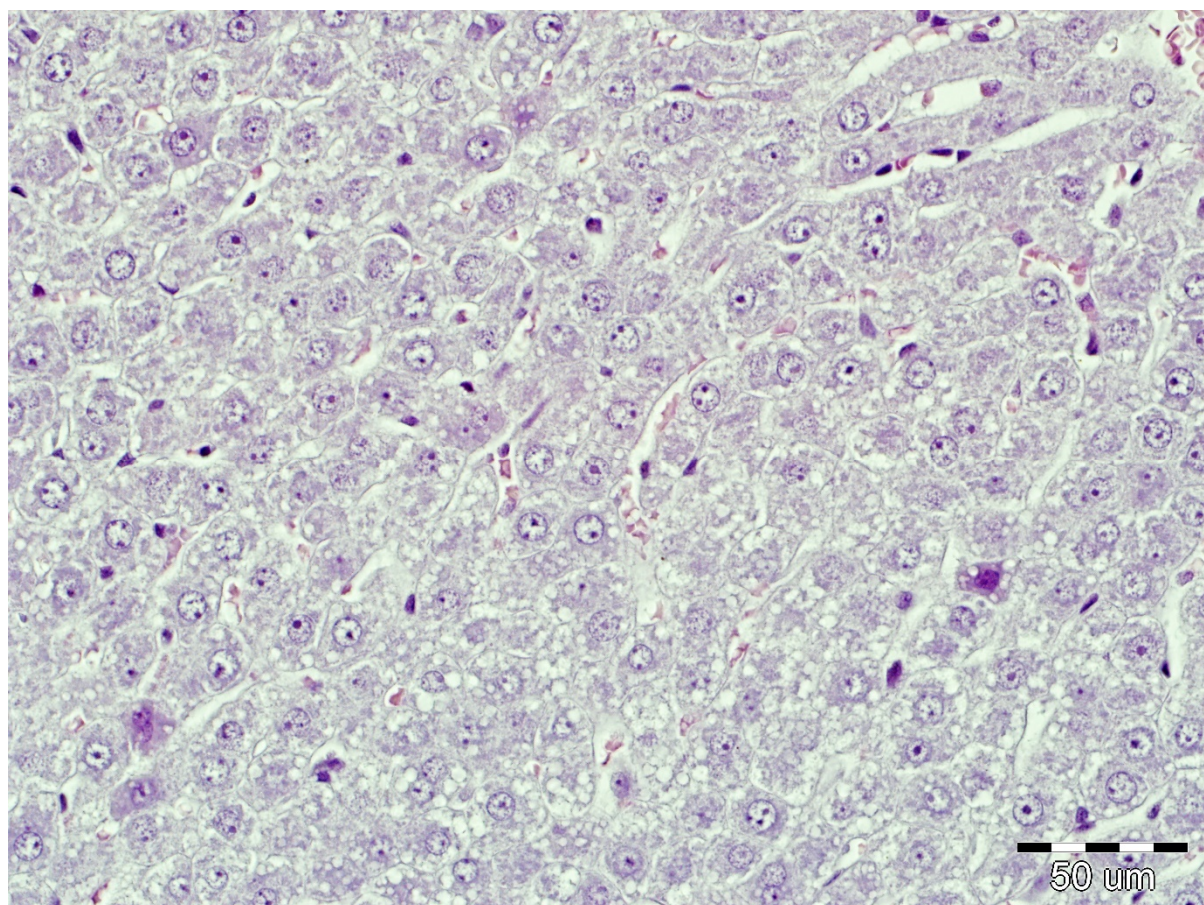

**Figure S4.** Histological findings validating the established rat model of hepatic ischemia-reperfusion injury —exemplary liver tissue from a SIR group animal (subjected to ischemia-reperfusion, pretreatment with sitagliptin). Slides were stained with hematoxylin and eosin and are presented at  $\times 400$  magnification with a reference bar corresponding with 50  $\mu\text{m}$ .
